# Supplementary material for: Deletion of inositol-requiring enzyme-1α in podocytes disrupts glomerular capillary integrity and autophagy
Source: PubMed Central journal article supplement — Mol Biol Cell. 2017 Jun 15;28(12):1636–51. doi: 10.1091/mbc.E16-12-0828 (PMC5469607; doi:10.1091/mbc.e16-12-0828), 2017-06-15
Supplement: supp_E16-12-0828v1_CombinedSupMatsKaufmanCorrected.pdf [file supp_E16-12-0828v1_CombinedSupMatsKaufmanCorrected.pdf]

# Supplemental Materials

*Molecular Biology of the Cell*

Kaufman et al.

## Supplementary Materials

Supplementary Figure 1

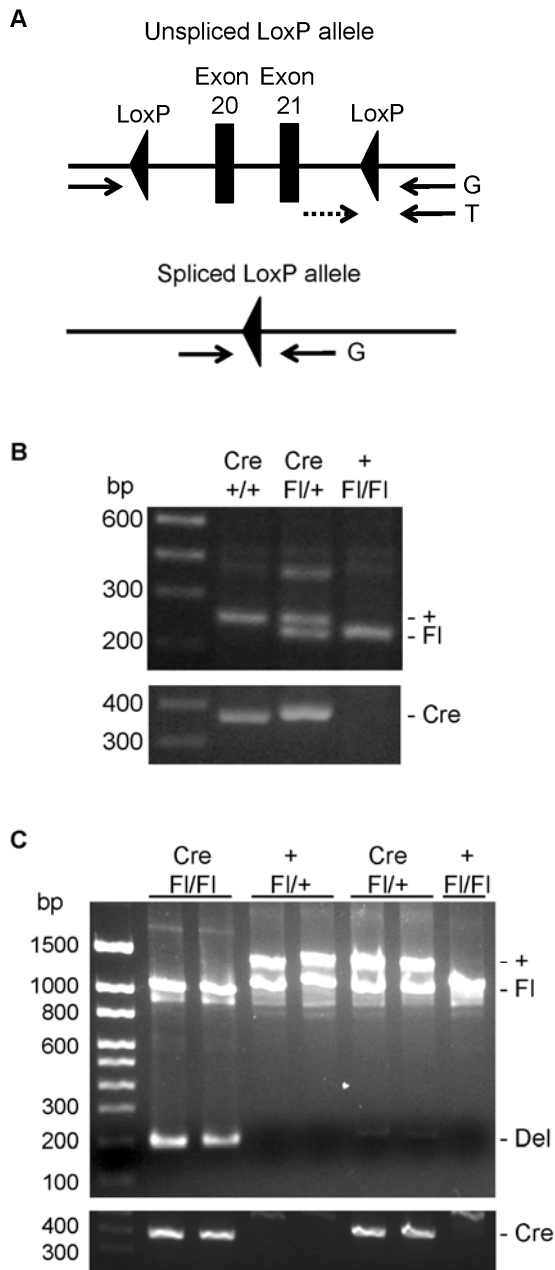

Supplementary Figure 1. Podocin-Cre recombinase removes IRE1 $\alpha$  exons 20-21 in podocytes.

A) IRE1 $\alpha$  allele containing LoxP sites (floxed or F1 allele), and positions of PCR primers used

for tail (T) and glomerular (G) PCR reactions. B) Representative mouse tail DNA PCR shows a 254 bp IRE1 $\alpha$  WT band (+/+ and Fl/+) and a 229 bp LoxP-containing unspliced band (Fl/+ and Fl/Fl). The lower panel shows a representative PCR for the podocin-Cre gene (374 bp). C) Glomerular DNA PCR shows a 1294 bp WT (+) allele product in Cre;Fl/+ and +;Fl/+ mice, a 1025 bp LoxP-containing unspliced-product (Fl) in all mice, and a 189 bp Cre-deletion product (Del) in Cre;Fl/Fl mice and to a lesser extent in Cre;Fl/+ mice. The 374 bp bands in the lower panel represent the podocin-Cre recombinase gene.

## Supplementary Figure 2

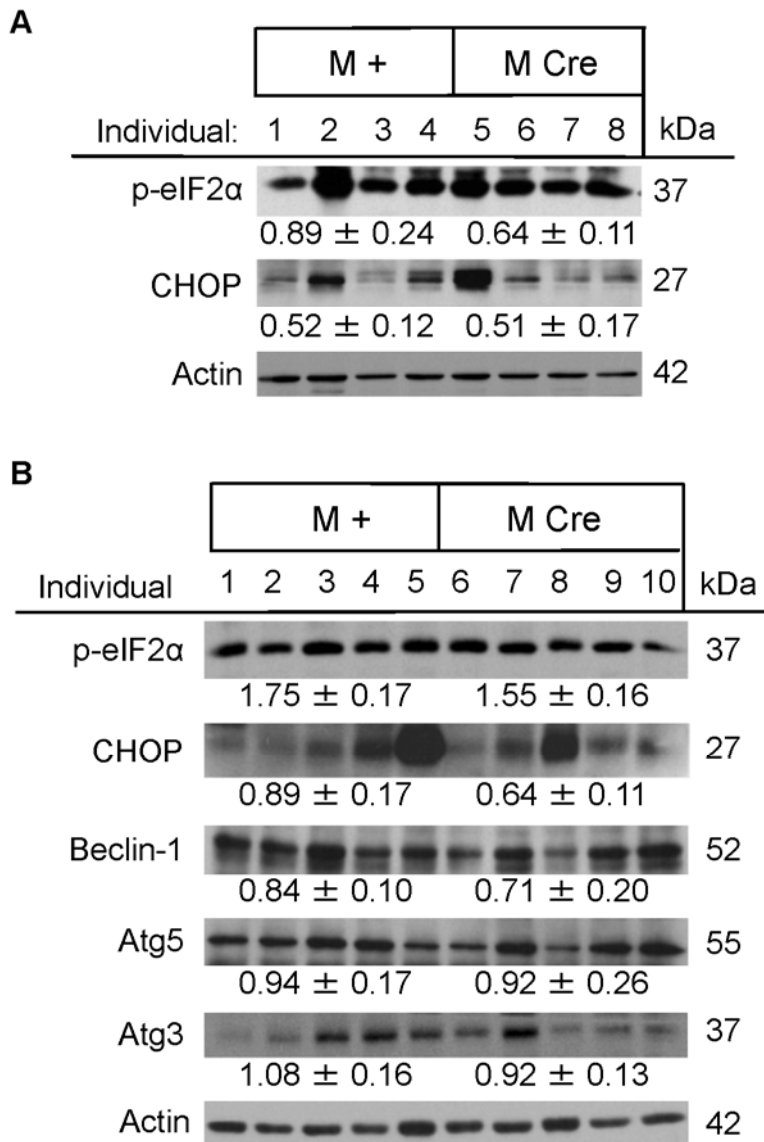

Supplementary Figure 2. Effect of podocyte IRE1 $\alpha$  deletion on markers of the UPR and autophagy. A) 4-5 month pre-albuminuric mice (4 per group). B) 9 month albuminuric mice (5 per group). Glomeruli were isolated from IRE1 $\alpha^{\text{flox/flox};+}$  (M +) and IRE1 $\alpha^{\text{flox/flox};\text{Cre}}$  (M Cre) mice. Lysates were immunoblotted with antibodies, as indicated. Densitometry measurements are

presented under each panel. There are no statistically significant differences between groups. (p-eIF2 $\alpha$ , phospho-eIF2 $\alpha$ ).

### Supplementary Figure 3

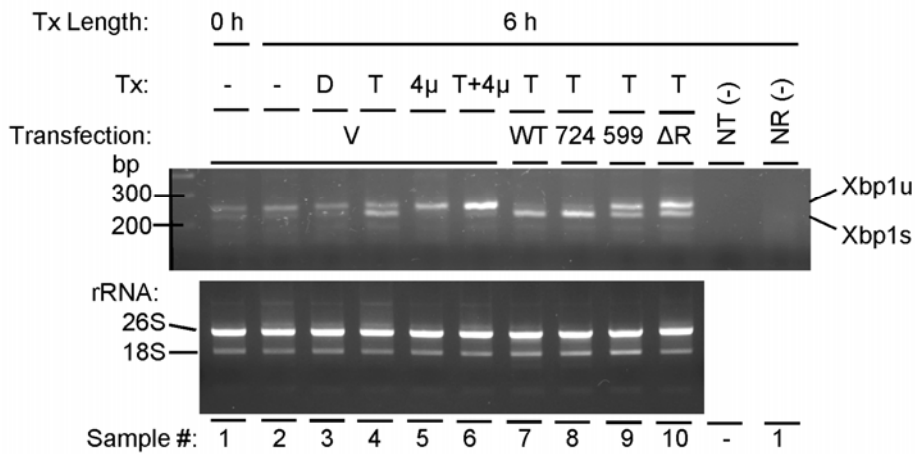

Supplementary Figure 3. Inhibition of IRE1 $\alpha$  with IRE1 $\alpha$  dominant negative mutants and 4 $\mu$ 8C. COS-1 cells were transiently transfected with vector (V), or FLAG-IRE1 $\alpha$  WT or mutants, as indicated. After 24 h, cells were treated with vehicle (DMSO, D), tunicamycin (T, 10  $\mu$ g/ml), the RNase inhibitor, 4 $\mu$ 8c (4 $\mu$ , 10  $\mu$ M), or tunicamycin + 4 $\mu$ 8c, for 6 h. Xbp1 splicing was assessed with RT-PCR. In addition to unspliced (u) Xbp1 (247 bp), a small amount of spliced (s) Xbp1 (221 bp) is detectable in vector-transfected, untreated or DMSO-treated cells, which is reduced in the presence of 4 $\mu$ 8c. Tunicamycin induced Xbp1 splicing, which was abolished by 4 $\mu$ 8c. The tunicamycin-induced splicing was potentiated by IRE1 $\alpha$  WT or S724A overexpression. Overexpression of IRE1 $\alpha$  K599A or  $\Delta$ R inhibited tunicamycin-induced Xbp1 splicing. Tx, treatment; rRNA, ribosomal RNA; NT, no template negative control; NR, no reverse transcriptase negative control.
